# Supplementary material
Source: PubMed Central journal article supplement (PMC3504748)
Supplement: supp_M112.378612_jbc.M112.378612-1.pdf [file supp_M112.378612_jbc.M112.378612-1.pdf]

## Search for additional internal exons:

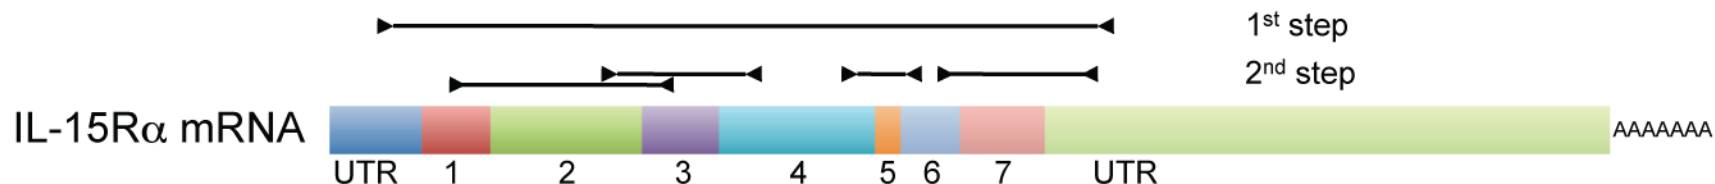

## Search for alternative C-terminal mRNA:

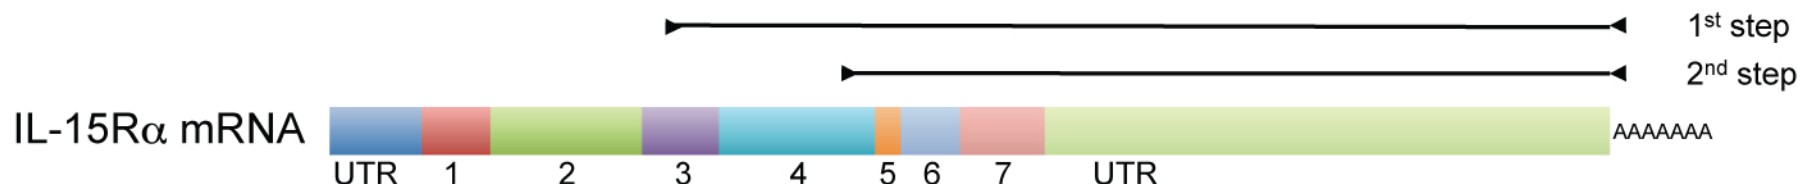

**Supp. Figure 1.** Cloning strategies to identify previously unknown exons of human IL-15R $\alpha$ .
