# Supplementary material
Source: PubMed Central journal article supplement (PMC3504748)
Supplement: supp_M112.378612_jbc.M112.378612-2.pdf [file supp_M112.378612_jbc.M112.378612-2.pdf]

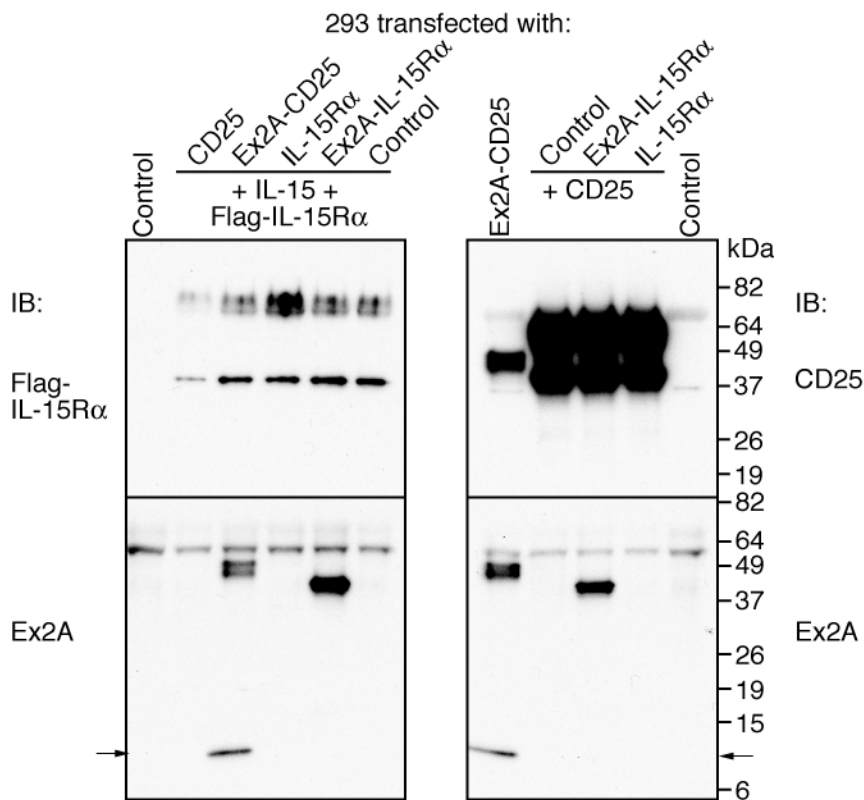

**Supp. Figure 2.** The Ex2A domain affects glycosylation in *cis* only. 293 cells co-expressed IL-15R $\alpha$  (left) or CD25 (right) and additional IL-15R $\alpha$  or CD25 that did or did not contain the Ex2A domain. No effect on migration patterns were observed in *trans*. The Ex2A domain appears to be partially cleaved from Ex2A-CD25 protein (arrows) but not from Ex2A-IL-15R $\alpha$ .
