# Supplementary material
Source: PubMed Central journal article supplement (PMC3504748)
Supplement: supp_M112.378612_jbc.M112.378612-4.pdf [file supp_M112.378612_jbc.M112.378612-4.pdf]

## Experiment 1

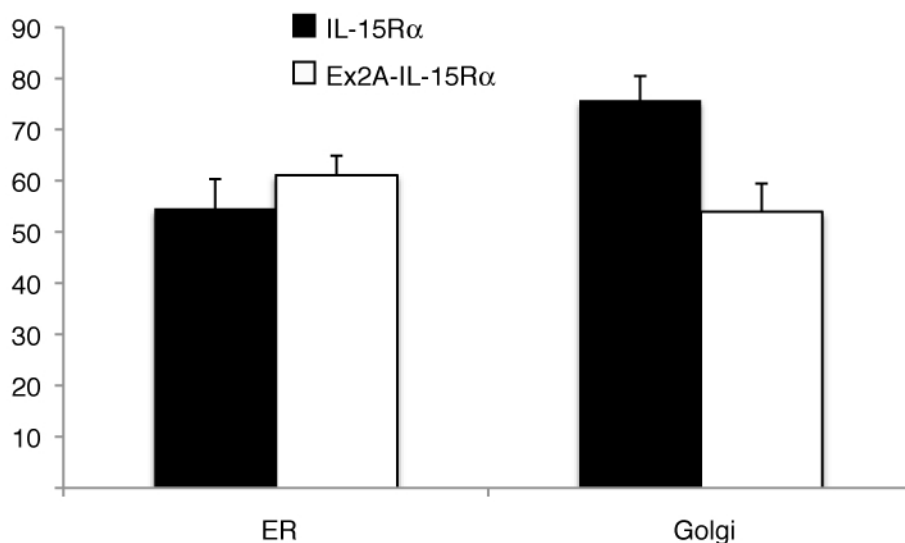

## Experiment 2

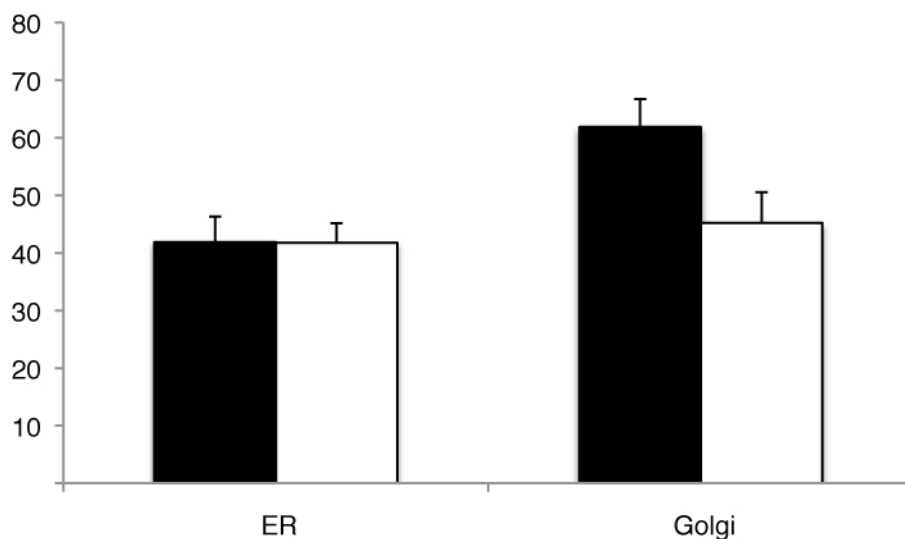

**Supp. Figure 4.** The Ex2A domain inhibits ER to Golgi transport of IL-15R $\alpha$ . U2OS cells that stably expressed human IL-15 and human IL-15R $\alpha$ -GFP with or without the Ex2A domain were stained for IL-15R $\alpha$ , the ER or the golgi. Bars represent the percentage of IL-15R $\alpha$  that co-localized with the ER or the golgi. In both experiments, the presence of the Ex2A domain decreased the percentage of IL-15R $\alpha$  that was associated with the golgi but not with the ER. Each bar represents the average of at least 20 randomly selected cells  $\pm$  SEM.
