# Supplementary material
Source: PubMed Central journal article supplement (PMC3504748)
Supplement: supp_M112.378612_jbc.M112.378612-5.pdf [file supp_M112.378612_jbc.M112.378612-5.pdf]

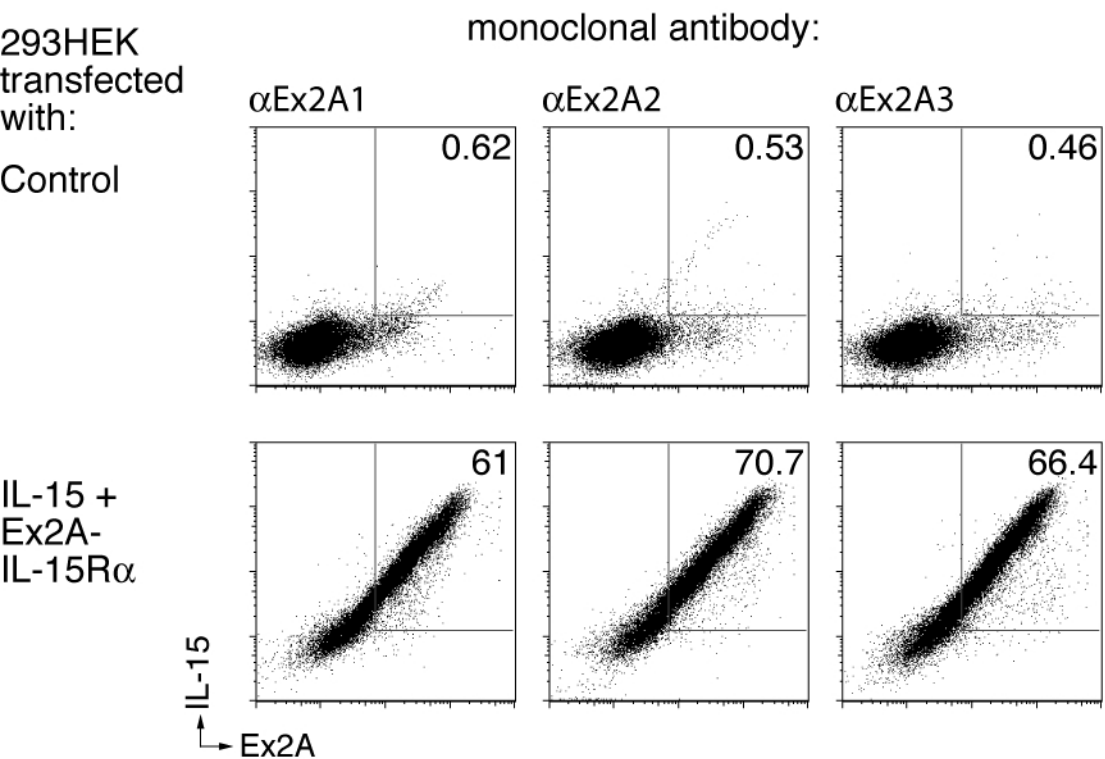

**Supp. Figure 5.** Testing of newly derived mouse monoclonal antibodies directed against the Ex2A domain of IL-15R $\alpha$  in transfected 293 cells.
