# Supplementary material
Source: PubMed Central journal article supplement (PMC3504748)
Supplement: supp_M112.378612_jbc.M112.378612-6.pdf [file supp_M112.378612_jbc.M112.378612-6.pdf]

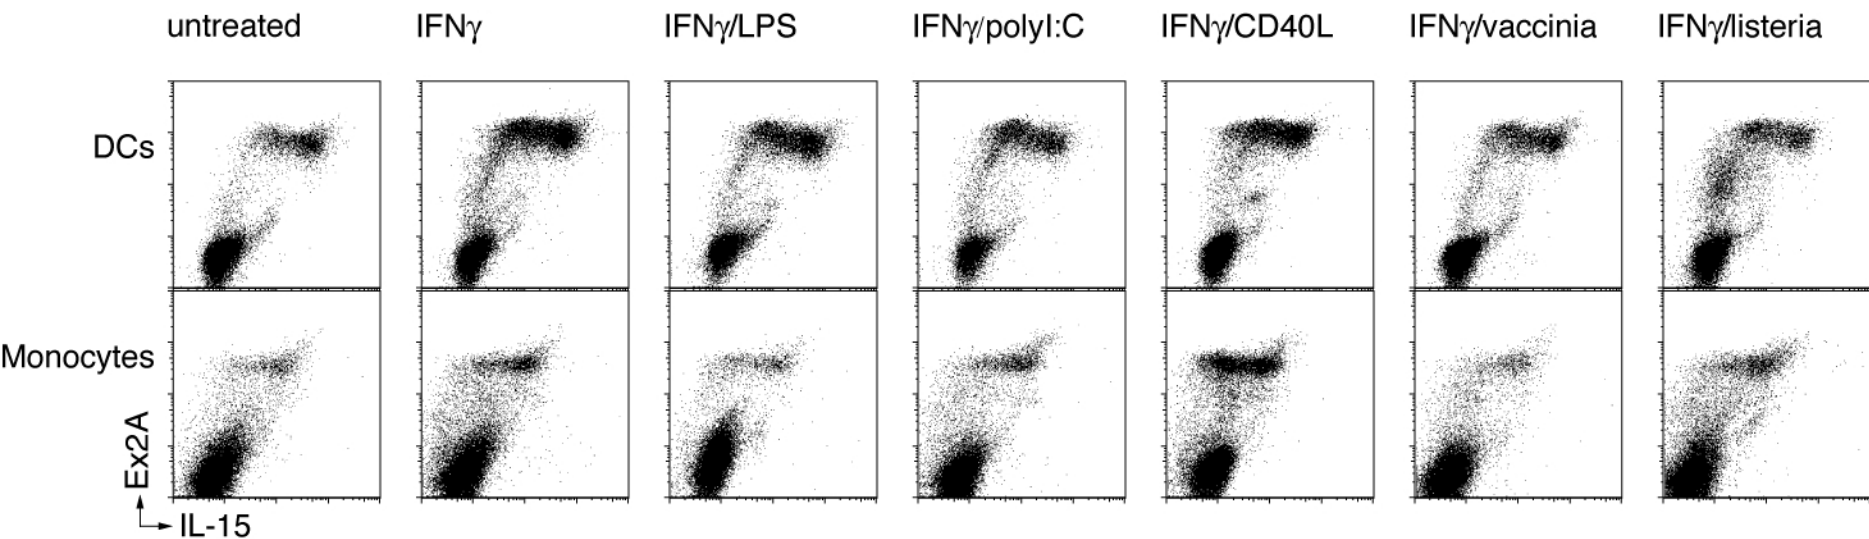

**Supp. Figure 6.** Expression of IL-15 and of the Ex2A domain of IL-15R $\alpha$  on variably activated human monocytes and dendritic cells. Note that no condition of surface IL-15 in the absence of Ex2A was found.
