# Supplementary material
Source: PubMed Central journal article supplement (PMC3504748)
Supplement: supp_M112.378612_jbc.M112.378612-7.pdf [file supp_M112.378612_jbc.M112.378612-7.pdf]

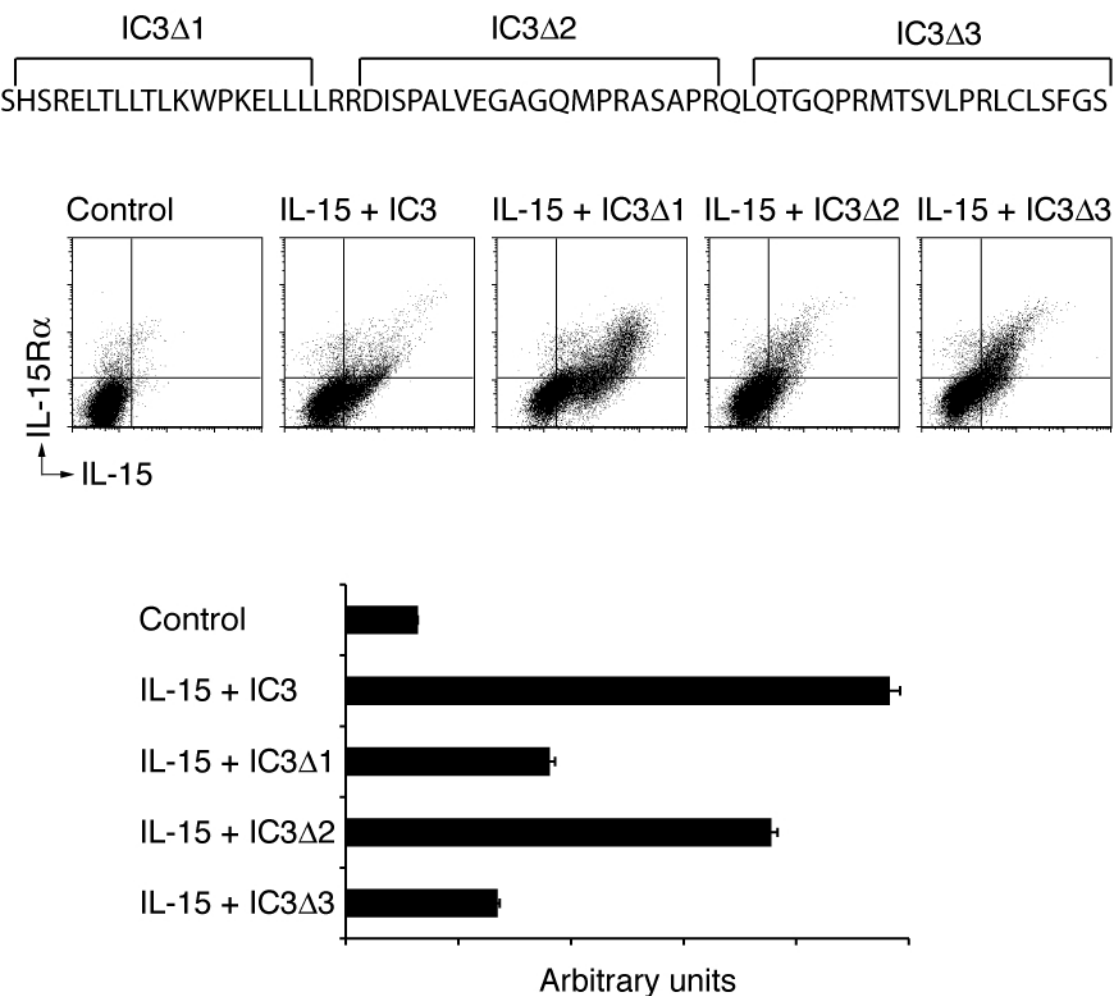

**Supp. Figure 7.** Secretion and surface expression of IL-15R $\alpha$ -IC3 deletion mutants. Deletion mutants of IC3 were generated that lacked amino acids at the N-terminus, center or C-terminus of its intracellular domain as shown on top. We co-expressed these mutants and IL-15 in 293HEK cells and analyzed surface expression (panels) and secretion (graph). Deletions at both the N- and C-termini appeared to cause an increase of surface expression and a decrease of secretion.
