# Supplementary material
Source: PubMed Central journal article supplement (PMC3504748)
Supplement: supp_M112.378612_jbc.M112.378612-9.pdf [file supp_M112.378612_jbc.M112.378612-9.pdf]

A

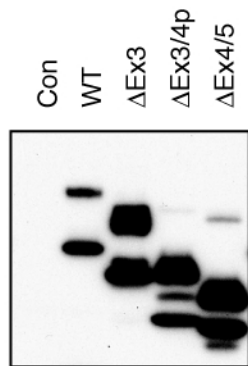

B

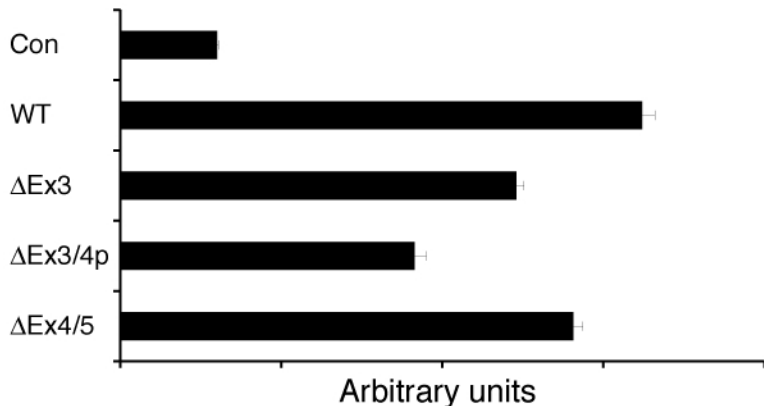

**Supp. Figure 9.** Amino acids encoded by IL-15R $\alpha$  exons 3, 4 and 5 are not necessary for its cleavage and release into the soluble phase. Naturally splice versions of IL-15R $\alpha$  that lacked exon 3, exon 3 and a 5' portion of exon 4 or exons 4 and 5 were co-expressed with IL-15 in 293HEK cells. We analyzed cell lysates by Western blotting (A) and supernatants by ELISA (B).
