# Supplementary material
Source: PubMed Central journal article supplement (PMC3504748)
Supplement: supp_M112.378612_jbc.M112.378612-10.pdf [file supp_M112.378612_jbc.M112.378612-10.pdf]

# Supplemental Figure 10

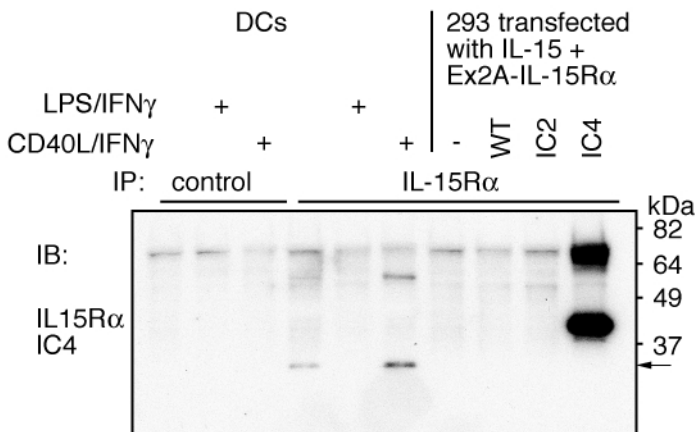

**Supp. Figure 10.** Detection of IL-15R $\alpha$ -IC4 in human dendritic cells. Antisera directed against IC4 were developed in rabbits and used to re-hybridize the membrane as shown in Figure 6. IL-15R $\alpha$ -IC4 appeared to be expressed at the expected size (arrow) in immature as well as in dendritic cells matured with IFN- $\gamma$  plus CD40 ligand.
