# Supplementary material
Source: PubMed Central journal article supplement (PMC3504748)
Supplement: supp_M112.378612_jbc.M112.378612-11.pdf [file supp_M112.378612_jbc.M112.378612-11.pdf]

**Supplemental Table.** Oligonucleotides used in this study

| Gene                 | Oligo sequence                   | Application                 |
|----------------------|----------------------------------|-----------------------------|
| CD40 ligand          | CACAGCATGATCGAAACATACAACCAAAC    | Cloning                     |
| CD40 ligand          | CAGCCTGCAAGGTGACACTGTTTCAGAG     | Cloning                     |
| IL-15                | CCCCTTGCCATAGCCAGCTCTTCTTC       | Cloning                     |
| IL-15                | GTTATGTCTAAGCAGCAGAGTGATGTTTG    | Cloning                     |
| CD25                 | CCCAAGGGTCAGGAAGATGGATTC         | Cloning                     |
| CD25                 | GGTTTTCTAGATTGTTCTTCTACTCTTCC    | Cloning                     |
| IL-15R $\alpha$      | GTGTCCTGTGGAGCTGCCGCCATG         | RT-PCR, 1st round           |
| IL-15R $\alpha$      | CCCGCTTCCTTGACCTCTTCTCAGTCGTC    | RT-PCR, 1st round           |
| IL-15R $\alpha$      | GGCGCTGCTACTGCTGCTGCTGCTCC       | RT-PCR, 2nd round           |
| IL-15R $\alpha$      | CCACGAATGTCGCCCACTGGACAACC       | RT-PCR, 2nd round           |
| IL-15R $\alpha$      | CTTCATCTCCCAGCTCAAACAACACAGC     | RT-PCR, 2nd round<br>3'race |
| IL-15R $\alpha$      | CACTGTCCTGCTGTGTGGGCTGAGC        | RT-PCR, 2nd round           |
| IL-15R $\alpha$      | GCTAAAGCAGAGAGGCTCCTTCACTCCGGAC  | RT-PCR, 2nd round           |
| IL-15R $\alpha$      | GCTCAGCCCACACAGCAGGACAGTG        | RT-PCR, 2nd round           |
| IL-15R $\alpha$      | CCAGCGCCACCCTCCACAGTAACGAC       | RT-PCR, 2nd round           |
| IL-15R $\alpha$      | GGGAGATGAAGCTGCGGGCTCTTTTC       | RT-PCR, 2nd round           |
| IL-15R $\alpha$      | CCAGCGCCACCCTCCACAGTAACGAC       | 3'race                      |
| IL-15R $\alpha$      | CCCCCCTTTTTTTTTTTTTTTTTTTTTTTVN  | 3'race                      |
| IL-15R $\alpha$ EM2  | CGATGAGATGGTTTTTGTGTCCTGATATG    | RT-PCR, 1st round           |
| IL-15R $\alpha$ IC2  | CCCGCGTCCTCAGCCAGCTCCAC          | RT-PCR, 1st round           |
| IL-15R $\alpha$ IC3  | ACACAAATCAATCAGCTCCCGAATG        | RT-PCR, 1st round           |
| IL-15R $\alpha$ IC4  | TTAAACAGGCACCATAGCACTGGCATAAC    | RT-PCR, 1st round           |
| IL-15R $\alpha$ IC5  | GTGACTCGCTTCGACGGATAGAATG        | RT-PCR, 1st round           |
| IL-15R $\alpha$ IC7  | GGACGTGGTCACTTCCAGCCTTTTG        | RT-PCR, 1st round           |
| IL-15R $\alpha$ Ex2a | GAGCTCTGCTTGCTGCCTGCTTGCCGATG    | Ex2a-CD25 chimera           |
| IL-15R $\alpha$      | GATATCCTAGGTGGTGAGAGCAGTTTTCCAAG | wt c-terminal tags          |

|                 |                                        |                         |
|-----------------|----------------------------------------|-------------------------|
| IL-15R $\alpha$ | GATATCCGCTCCCGAATGACAAGCACAG           | IC3 c-terminal tags     |
| IL-15R $\alpha$ | ACGCGTGAGGCCTGCGTGAGACTCAG             | Ex2A deletions          |
| IL-15R $\alpha$ | ACGCGTGTGAGACTCAGGACAATGG              | Ex2A deletions          |
| IL-15R $\alpha$ | AAGCTTCTTGCATCCCGCGTC                  | Ex2A deletions          |
| IL-15R $\alpha$ | AAGCTTCATGGAAAAGTCCCCCAGTG             | Ex2A deletions          |
| IL-15R $\alpha$ | CACGTGGTCCTGAGTCTCACGCAG               | Ex2A deletions          |
| IL-15R $\alpha$ | CACGTGTGTGTCTGGACCTCATGGTTG            | Ex2A deletions          |
| IL-15R $\alpha$ | ACGCGTGTCTGCTGGAGTTCGTG                | Ex2A to GFP replacement |
| IL-15R $\alpha$ | TCCGGACATGCCGAGAGTGATCC                | Ex2A to GFP replacement |
| IL-15R $\alpha$ | CATCTCCCAGCTCACAGAACACAGCGGCCAC        | N107Q                   |
| IL-15R $\alpha$ | GTGGCCGCTGTGTTCTGTGAGCTGGGAGATG        | N107Q                   |
| IL-15R $\alpha$ | CTGGGAACTCACAGCAGCCGCCGCCACCAGCCGCCAG  | S158/160A               |
| IL-15R $\alpha$ | CTGGCGGCTGGTGGGCGGCGGCTGCTGTGAGTTCCCAG | S158/160A               |
| IL-15R $\alpha$ | TCCGGAGAGAGCTTGACTTGAGGTAGCATG         | IC3 deletions           |
| IL-15R $\alpha$ | TCCGGAGGCAGCTCCAGACAGGCCAGC            | IC3 deletions           |
| IL-15R $\alpha$ | TTAGAGCTGCCTGGGTGCTGATG                | IC3 deletions           |
| IL-15R $\alpha$ | CTTAAGTCAAGCTCTCACTCCAGGGAG            | CD25-IC3 chimera        |
| IL-15R $\alpha$ | CTTAAGGGTGAGCCCACTCAGGAGGAGGAC         | CD25-IC3 chimera        |
